# Supplementary material
Source: Elsevier journal article supplement (https://www.sciencedirect.com/science/article/pii/S113459341000028X)
Supplement: mmc1 [file S113459341000028X:mmc1.doc]

**Tabla 1 complementaria. Consecuencias de la autolisis**

| Consecuencia | %a | Medianab |
| --- | --- | --- |
|  |  |  |
| Experimento dolor físico | 95 | Habitualmente |
| Me quedan marcas en la piel | 95 | Habitualmente |
| Me siento major | 82 | A veces |
| Siento mayor control de mí mismo | 77 | Habitualmente |
| Me tranquilizo | 74 | Habitualmente |
| Experimento una descarga de adrenalina | 74 | A veces |
| La ansiedad disminuye | 72 | A veces |
| Mi nivel de estrés disminuye | 69 | A veces |
| Me aleja de los demás | 64 | A veces |
| Me siento menos enojado | 59 | A veces |
| Siento mis emociones con menos intensidad | 59 | A veces |
| Me distrae de mis recuerdos | 59 | A veces |
| Me siento culpable | 56 | A veces |
| Para traer a mi memoria recuerdos del pasado | 51 | A veces |
| Lloro | 51 | A veces |
| Me siento mal | 51 | A veces |
| Mis amigos íntimos se preocupan por mí | 51 | A veces |
| Siento mis emociones con más intensidad | 49 | Rara vez |
| Me siento independiente/autónomo | 49 | Rara vez |
| Mi familia se preocupa por mí | 44 | Rara vez |
| Me siento más vivo | 44 | Rara vez |
| La gente me pregunta por las cicatrices de mi cuerpo | 41 | Rara vez |
| Mantengo a los demás a distancia | 41 | Rara vez |
| Me siento como si hubiera perdido el control sobre mi mismo | 39 | Rara vez |
| Me distrae de mis recuerdos traumáticos | 39 | Rara vez |
| Me siento más enojado | 39 | Rara vez |
| Evito peleas con amigos/familia | 39 | Nunca |
| Me siento más real | 36 | Rara vez |
| Mis parejas sentimentales actúan de manera diferente conmigo | 36 | Nunca |
| Causa peleas con amigos/familia | 36 | Nunca |
| Induce pensamientos suicidas | 33 | Rara vez |
| Hace que mi cuerpo sea menos atractivo | 33 | Nunca |
| Mis amigos se comportan de manera diferente conmigo | 33 | Nunca |
| Mi nivel de estrés aumenta | 31 | Rara vez |
| Me siento menos atractivo | 31 | Nunca |
| Mi ansiedad aumenta | 28 | Rara vez |
| Me siento menos vivo | 28 | Nunca |
| Me siento menos seguro | 28 | Nunca |
| Me siento más yo mismo | 28 | Nunca |
| Dejo de llorar | 26 | Nunca |
| Me siento menos culpable | 23 | Nunca |
| Me acerca a los demás | 21 | Nunca |
| Se interrumpen mis *flashbacks* | 20 | Nunca |
| Detiene mis pensamientos suicidas | 18 | Nunca |
| Me siento seguro | 18 | Nunca |
| La gente me toma más en serio | 13 | Nunca |
| Requiero atención médica | 3 | Nunca |
| Aumenta mi excitación sexual | 0 | Nunca |

aHace referencia al porcentaje de participantes que valoraron la consecuencia como acontecida, como mínimo, a veces (es decir, a veces, habitualmente o siempre).

bHace referencia a la mediana de valoraciones de los participantes de la frecuencia con la que ocurrió la consecuencia de la lesión autoinfligida en una escala de cinco puntos: 1 (nunca); 2 (rara vez), 3 (a veces), 4 (habitualmente) y 5 (siempre).

**Tabla 2 Complentaria. Razones de la autolisis**

| Razón | No pertinentea | Primaria | Secundaria |
| --- | --- | --- | --- |
|  |  |  |  |
| Para liberar la presión emocional que se acumula en mi interior | 0 | 85 | 15 |
| Para deshacerme de emociones intolerables | 13 | 56 | 31 |
| Para controlar cómo me siento | 15 | 59 | 26 |
| Para expresar cólera conmigo mismo | 21 | 33 | 46 |
| Para producirme un dolor que puedo controlar | 23 | 54 | 23 |
| Para inducirme dolor físico que puede ser agradable o reconfortante | 23 | 44 | 33 |
| Para confirmar el control sobre mí mismo | 26 | 41 | 33 |
| Para centrarme de nuevo | 31 | 26 | 44 |
| Para castigarme | 31 | 15 | 54 |
| Para crear una marca o señal física de lo que siento | 36 | 15 | 49 |
| Para afrontar mi soledad | 41 | 10 | 49 |
| Para disminuir mi sensación de vacío | 41 | 26 | 33 |
| Para sentirme de nuevo yo mismo | 54 | 10 | 36 |
| Para dejar de sentirme fragmentado o no entero | 54 | 8 | 39 |
| Para comprobar si puedo tolerar el dolor | 51 | 13 | 36 |
| Para afrontar/evitar recuerdos de experiencias negativas de la infancia | 59 | 15 | 26 |
| Para saber si soy capaz de sentir dolor físico | 62 | 15 | 24 |
| Por la curiosidad de saber qué sentiré | 62 | 14 | 24 |
| Para expresar repugnancia por mi cuerpo/atractivo | 67 | 10 | 23 |
| Para que los demás sepan por lo que estoy pasando | 67 | 5 | 28 |
| Para sentirme real | 68 | 18 | 13 |
| Para sentirme risueño | 69 | 21 | 10 |
| Para expresar cómo me siento a los demás | 69 | 3 | 28 |
| Para que los demás reaccionen | 77 | 3 | 21 |
| Para que los demás entiendan por lo que estoy pasando | 77 | 8 | 15 |
| Para evitar el impulso de suicidarme | 77 | 6 | 18 |
| Para afrontar el aburrimiento | 78 | 11 | 11 |
| Para cuidar de mí mismo | 80 | 3 | 18 |
| Para crear recuerdos físicos de acontecimientos importantes | 85 | 3 | 13 |
| Para evitar sentirme aislado | 85 | 3 | 13 |
| Para crear lazos con mis amigos | 87 | 8 | 5 |
| Para demostrar que soy responsable de mi bienestar | 87 | 5 | 8 |
| Para adaptarme a mi grupo de amigos | 87 | 5 | 8 |
| Para controlar cómo me tratan los demás | 87 | 0 | 13 |
| Para obtener una liberación física que percibo como muy similar a una liberación sexual | 90 | 5 | 5 |
| Para crear vínculos simbólicos entre los demás y yo | 92 | 3 | 5 |
| Para distraerme de los impulsos/fantasías sexuales incómodos | 100 | 0 | 0 |

aLas tres columnas de la derecha indican el porcentaje de participantes que valoró cada razón como “primaria”, “secundaria”, o “no pertinente”. Los porcentajes para un ítem dado pueden no sumar exactamente 100 debido a un error de redondeo.

**Tabla 3 complementaria. Estados afectivos antes y después de las lesiones autoinfligidas**

| Antes | | |  | Después | | |
| --- | --- | --- | --- | --- | --- | --- |
| Estado afectivo | %a | Medianab |  | Estado afectivo | %a | Medianab |
|  |  |  |  |  |  |  |
| Abrumado | 85 | Habitualmente |  | Aliviado | 77 | A veces |
| Triste | 82 | Habitualmente |  | Enojado consigo mismo | 77 | A veces |
| Herido desde un punto de vista emocional | 82 | Habitualmente |  | Tranquilo | 72 | A veces |
| Frustrado | 80 | Habitualmente |  | Herido desde un punto de vista emocional | 66 | A veces |
| Ansioso | 77 | Habitualmente |  | Solo | 64 | A veces |
| Solo | 74 | A veces |  | Triste | 64 | A veces |
| Enojado consigo mismo | 72 | A veces |  | Aislado | 62 | A veces |
| Vacío | 69 | A veces |  | Avergonzado | 59 | A veces |
| Aislado | 67 | A veces |  | Relajado | 59 | A veces |
| Desesperado | 63 | A veces |  | Culpable | 59 | A veces |
| Enojado con los demás | 62 | A veces |  | Abrumado | 59 | A veces |
| Fuera de control | 61 | A veces |  | Satisfecho | 56 | A veces |
| Despreciable | 59 | A veces |  | Frustrado | 54 | A veces |
| Rechazado | 54 | A veces |  | Desesperado | 50 | Rara vez |
| Apenado | 50 | Rara vez |  | Azorado | 49 | Rara vez |
| Inútil | 50 | Rara vez |  | Vacío | 46 | Rara vez |
| Inquieto | 42 | Nunca |  | Despreciable | 41 | Rara vez |
| Repugnacia por su cuerpo | 41 | Nunca |  | Feliz | 41 | Nunca |
| Avergonzado | 33 | Nunca |  | Inútil | 40 | Rara vez |
| Estúpido | 28 | Nunca |  | Ansioso | 39 | Rara vez |
| Indiferente | 26 | Nunca |  | Repugnancia hacia mi cuerpo | 39 | Nunca |
| En trance | 26 | Nunca |  | Estúpido | 36 | Nunca |
| Culpable | 23 | Nunca |  | Aterrorizado | 36 | Nunca |
| Fascinado | 23 | Nunca |  | Apenado | 35 | Rara vez |
| Aburrido | 23 | Nunca |  | Rechazado | 31 | Rara vez |
| Asustado | 21 | Nunca |  | Esperanzado | 29 | Nunca |
| Aterrorizado | 21 | Nunca |  | Enojado con los demás | 26 | Rara vez |
| Sin percepción de mi entornoc | 21 | Nunca |  | Fuera de control | 26 | Rara vez |
| Azorado | 21 | Nunca |  | Asustado | 26 | Nunca |
| Excitado | 18 | Nunca |  | Indiferente | 26 | Nunca |
| Irreal | 18 | Nunca |  | Excitado | 23 | Nunca |
| Fuera de su cuerpo | 13 | Nunca |  | Fascinado | 23 | Nunca |
| Esperanzado | 13 | Nunca |  | Irreal | 18 | Nunca |
| Relajado | 13 | Nunca |  | En trance | 18 | Nunca |
| Tranquilo | 10 | Nunca |  | Inquieto | 16 | Nunca |
| Feliz | 10 | Nunca |  | Aburrido | 15 | Nunca |
| Satisfecho | 5 | Nunca |  | Sin percepción del entornoc | 13 | Nunca |
| Eufórico | 5 | Nunca |  | Eufórico | 13 | Nunca |
| Aliviado | 0 | Nunca |  | Fuera de su cuerpo | 5 | Nunca |
| Excitación sexual | 0 | Nunca |  | Excitación sexual | 0 | Nunca |

aHace referencia al porcentaje de participantes que valoraron el estado afectivo como acontecido, como mínimo, a veces (es decir, a veces, habitualmente o siempre).

bIndica la mediana de valoraciones de los participantes de la frecuencia con que ocurrió el estado afectivo en una escala de cinco puntos: 1 (nunca); 2 (rara vez), 3 (a veces), 4 (habitualmente) y 5 (siempre).

cIndica “sin darse cuenta de lo que lo rodea”.

**Tabla 4 complementaria. Cambios del afecto desde antes hasta después de las lesiones autoinfligidas**

| Estado afectivo | *d* de Cohena |
| --- | --- |
| Aliviado | 2,25 |
| Tranquilo | 1,39 |
| Satisfecho | 1,24 |
| Relajado | 1,21 |
| Abrumado | -0,89 |
| Enojado con los demás | -0,89 |
| Culpable | 0,83 |
| Ansioso | -0,81 |
| Feliz | 0,73 |
| Avergonzado | 0,68 |
| Frustrado | -0,66 |
| Azorado | 0,64 |
| Esperanzado | 0,56 |
| Fuera de control | -0,55 |
| Herido desde un punto de vista emocional | -0,49 |
| Triste | -0,48 |
| Inquieto | -0,46 |
| Rechazado | -0,45 |
| Vacío | -0,40 |
| Despreciable | -0,39 |
| Eufórico | 0,36 |
| Desesperado | -0,35 |
| Apenado | -0,33 |
| Inútil | -0,26 |
| Fuera de su cuerpo | -0,25 |
| En trance | -0,23 |
| Aburrido | -0,20 |
| Solo | -0,19 |
| Aterrorizado | 0,19 |
| Asustado | 0,16 |
| Aislado | -0,13 |
| Fascinado | 0,11 |
| Estúpido | 0,08 |
| Enojado consigo mismo | -0,08 |
| Sin percepción del entorno | -0,06 |
| Indiferente | -0,05 |
| Repugnancia por su cuerpo | -0,03 |
| Excitado | 0,02 |
| Irreal | -0,02 |
| Excitación sexual | 0,00 |

aLos valores positivos indican un aumento de la frecuencia de un estado afectivo desde antes hasta después de la autolisis. Los valores negativos indican una disminución de su frecuencia desde antes hasta después de ella. Por convención, los valores *d* de Cohen < 0,2 se consideran bajos, de 0,2-0,8 moderados y > 0,8 en general indican cambios importantes.
